# Supplementary material for: Trypanosoma brucei Polo-like kinase is essential for basal body duplication, kDNA segregation and cytokinesis
Source: PubMed Central journal article supplement (PMC2169650; doi:10.1111/j.1365-2958.2007.05866.x), 2007-09
Supplement: mmi0065-1229-SD1.pdf [file mmi0065-1229-SD1.pdf]

**Table S1****Median relative kDNA intensity values****PLK RNAi cells**

| <b>Sample</b>    | <b>Cell type</b> | <b>Relative median kDNA intensity</b> |
|------------------|------------------|---------------------------------------|
| - tet            | 1N1K             | 1.20                                  |
|                  | 1N2Kc            | 2.17                                  |
|                  | 1N2Ks            | 1.00                                  |
| t = 22 hrs + tet | 1N1K             | 1.22                                  |
|                  | 1N2Kc            | 2.06                                  |
|                  | 2N1K             | 1.31                                  |
|                  | 1N2Ks            | 1.00                                  |
| t = 30 hrs + tet | 1N1K             | 2.05                                  |
|                  | 1N2Kc            | 2.03                                  |
|                  | 2N1K             | 2.05                                  |
|                  | >2N1K            | 2.98                                  |
|                  | 1N2Ks            | 1.00                                  |

**PLKty overexpressing cells**

| <b>Sample</b>      | <b>Cell type</b> | <b>Relative median kDNA intensity</b> |
|--------------------|------------------|---------------------------------------|
| - tet              | 1N1K             | 1.25                                  |
|                    | 1N2Kc            | 1.78                                  |
|                    | 1N2Ks            | 1.00                                  |
| t = 14.5 hrs + tet | 1N1K             | 1.08                                  |
|                    | 1N2Kc            | 2.06                                  |
|                    | 2N1K             | 1.69                                  |
|                    | 1N2Ks            | 1.00                                  |
| t = 18 hrs + tet   | 1N1K             | 1.75                                  |
|                    | 1N2Kc            | 1.93                                  |
|                    | 2N1K             | 2.43                                  |
|                    | 1N2Ks            | 1.00                                  |

**Table S2**

Changes in sequence of *PLK* from MiTat221 compared to the genome strain TREU 927 GUTat 10.1.

| <b>Base</b> | <b>TREU 927 GUTat.10.1</b> | <b>MiTat221</b> | <b>Mutation</b>   |
|-------------|----------------------------|-----------------|-------------------|
| 960         | G                          | A               | Silent            |
| 1245        | CAA CAA CAA CAA CAA        | Deleted         | Deletion of NNNNN |
| 1282        | AAC AAC AAC AAC            | GCC ATA AAC CCC | NNNN to AINP      |
| 1344        | A                          | G               | Silent            |
| 1438        | G                          | A               | V to A            |
| 1485        | T                          | C               | Silent            |
| 1515        | T                          | A               | Silent            |
| 1582        | C                          | G               | P to A            |
| 1830        | T                          | C               | Silent            |
| 2025        | C                          | T               | Silent            |
| 2142        | A                          | G               | silent            |

**Figure S1 - Abnormal cells for bloodstream form *PLK* RNAi cell lines**

Clone 7                    t=6 hrs + tet                    total cells counted = 514, total abnormal cells = 87  
 (16.9%), of which 30 (5.8%) were unclassifiable

|                  |   | number of kinetoplasts |   |   |   |    |   |   |
|------------------|---|------------------------|---|---|---|----|---|---|
|                  |   | 0                      | 1 | 2 | 3 | 4  | 5 | 6 |
| number of nuclei | 0 |                        | 3 | 1 |   |    |   |   |
|                  | 1 | 9                      |   |   |   |    |   |   |
|                  | 2 | 3                      | 2 |   | 7 | 7  |   | 1 |
|                  | 3 |                        |   | 3 | 4 | 3  |   |   |
|                  | 4 | 2                      |   |   |   | 11 | 1 |   |
|                  | 5 |                        |   |   |   |    |   |   |
|                  | 6 |                        |   |   |   |    |   |   |
|                  | 6 |                        |   |   |   |    |   |   |

Clone 7                    t=8 hrs + tet                    total cells counted = 488, total abnormal cells = 146  
 (29.9%), of which 47 (9.6%) were unclassifiable

|                  |   | number of kinetoplasts |    |   |    |    |   |   |
|------------------|---|------------------------|----|---|----|----|---|---|
|                  |   | 0                      | 1  | 2 | 3  | 4  | 5 | 6 |
| number of nuclei | 0 |                        | 6  | 2 |    |    |   |   |
|                  | 1 |                        |    |   |    |    |   |   |
|                  | 2 | 3                      | 29 |   | 10 | 7  |   |   |
|                  | 3 |                        | 1  | 5 | 2  | 5  | 1 |   |
|                  | 4 |                        |    | 3 | 8  | 15 |   | 1 |
|                  | 5 |                        |    |   |    | 1  |   |   |
|                  | 6 |                        |    |   |    |    |   |   |
|                  | 6 |                        |    |   |    |    |   |   |

Clone 7                    t=10 hrs + tet                    total cells counted = 409, total abnormal cells = 208  
 (50.9%), of which 54 (13.2%) were unclassifiable

|                  |   | number of kinetoplasts |    |    |    |    |   |   |
|------------------|---|------------------------|----|----|----|----|---|---|
|                  |   | 0                      | 1  | 2  | 3  | 4  | 5 | 6 |
| number of nuclei | 0 |                        | 6  | 1  |    |    |   |   |
|                  | 1 | 3                      |    |    | 2  |    |   |   |
|                  | 2 | 2                      | 31 |    | 23 | 8  |   |   |
|                  | 3 |                        | 1  | 11 | 16 | 2  |   |   |
|                  | 4 | 2                      | 3  | 5  | 16 | 15 |   |   |
|                  | 5 |                        |    | 1  | 3  | 2  |   |   |
|                  | 6 |                        |    |    |    |    |   |   |
|                  | 7 |                        |    |    | 1  |    |   |   |

Clone 15

t=6 hrs + tet

total cells counted = 412, total abnormal cells = 80  
(19.4%), of which 48 (11.7%) were unclassifiable

|                  |   | number of kinetoplasts |   |   |   |    |   |   |
|------------------|---|------------------------|---|---|---|----|---|---|
|                  |   | 0                      | 1 | 2 | 3 | 4  | 5 | 6 |
| number of nuclei | 0 |                        | 2 |   |   |    |   |   |
|                  | 1 | 2                      |   |   | 1 |    |   |   |
|                  | 2 |                        | 7 |   | 5 | 10 |   |   |
|                  | 3 |                        |   | 1 | 2 | 1  |   |   |
|                  | 4 |                        |   |   | 1 | 1  |   |   |
|                  | 5 |                        |   |   |   |    |   |   |
|                  | 6 |                        |   |   |   |    |   |   |

Clone 15

t=8 hrs + tet

total cells counted = 417, total abnormal cells = 133  
(31.9%), of which 86 (20.6%) were unclassifiable

|                  |   | number of kinetoplasts |    |   |   |   |   |   |
|------------------|---|------------------------|----|---|---|---|---|---|
|                  |   | 0                      | 1  | 2 | 3 | 4 | 5 | 6 |
| number of nuclei | 0 |                        |    |   |   |   |   |   |
|                  | 1 | 5                      |    |   |   |   |   |   |
|                  | 2 |                        | 15 |   | 6 | 3 |   |   |
|                  | 3 |                        |    | 2 | 8 | 4 |   |   |
|                  | 4 |                        |    |   | 1 | 3 |   |   |
|                  | 5 |                        |    |   |   |   |   |   |
|                  | 6 |                        |    |   |   |   |   |   |
